# Supplementary material for: BMP-SMAD signalling output is highly regionalized in cardiovascular and lymphatic endothelial networks
Source: PubMed Central journal article supplement (PMC5057272; doi:10.1186/s12861-016-0133-x), 2016-10-10

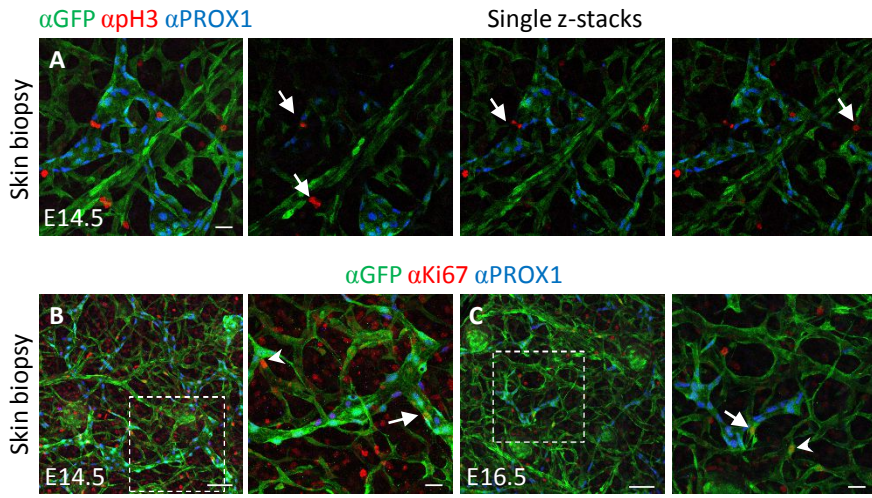

Supplement: 12861_2016_133_MOESM8_ESM.pdf [file 12861_2016_133_MOESM8_ESM.pdf]
